# Supplementary material for: Immunogenicity of BNT162b2 mRNA SARS-CoV-2 vaccine in patients with psoriatic arthritis on TNF inhibitors
Source: HighWire-hosted journal article supplement (doi:10.1136/rmdopen-2021-001847), 2022-01-01
Supplement: rmdopen-2021-001847supp001_data_supplement.pdf [file rmdopen-2021-001847supp001_data_supplement.pdf]

## SUPPLEMENTARY MATERIAL

| Patient Characteristics                        | No-methotrexate |      |        | Methotrexate |      |         |
|------------------------------------------------|-----------------|------|--------|--------------|------|---------|
|                                                | Av.Obs.         |      |        | Av.Obs.      |      |         |
| Age, mean (SD)                                 | 28              | 51.5 | (10.9) | 12           | 56.3 | (8.7)   |
| Female, n (%)                                  | 28              | 15   | (53.6) | 12           | 3    | (25)    |
| Disease duration, years, mean (SD)             | 28              | 11   | (6.9)  | 12           | 11   | (13.1)  |
| Axial, n (%)                                   | 28              | 2    | 7.1    | 12           | 4    | (33.3)* |
| Psoriasis, n (%)                               | 28              | 23   | (82.1) | 12           | 10   | (83.3)  |
| Polyarticular, n (%)                           | 28              | 14   | (50)   | 12           | 4    | (33.3)  |
| PsAID12 at vaccination, mean (SD)              | 28              | 3.6  | (3.2)  | 12           | 2.3  | (1.55)  |
| MMAS-4 at vaccination, median (min-max)        | 28              | 0    | (0-1)  | 12           | 0    | (0-1)   |
| DAPSA at vaccination, mean (SD)                | 28              | 12.3 | (8.2)  | 12           | 9.2  | (6.7)   |
| PASI at vaccination, mean (SD)                 | 28              | 0.7  | (1.1)  | 12           | 0.3  | (0.7)   |
| CDAI at vaccination, mean (SD)                 | 28              | 7.9  | (5.6)  | 12           | 5    | (3.8)   |
| CDAI Remission/LDA at vaccination, n (%)       | 28              | 18   | (64.3) | 12           | 10   | (83.3)  |
| CDAI post-vaccination, mean (SD)               | 28              | 7.9  | (5.6)  | 12           | 4.9  | (3.7)   |
| CDAI Remission/LDA post-vaccination, n (%)     | 28              | 17   | (60.7) | 12           | 10   | (83.3)  |
| Glucocorticoid, n (%)                          | 28              | 5    | (17.9) | 12           | 6    | (50)**  |
| Glucocorticoid dose, mean (SD)                 | 28              | 4.7  | (2)    | 12           | 4.6  | (2.1)   |
| Last methotrexate dose, days, median (min-max) | 28              | -    | -      | 12           | 3    | (1-6)   |
| Sulfasalazine, n (%)                           | 28              | 7    | (25)   | 12           | 0    | (0)*    |
| bDMARD treatment 1st line, n (%)               | 28              | 5    | (17.9) | 12           | 2    | (16.7)  |
| bDMARD treatment 2nd line, n (%)               | 28              | 21   | (75)   | 12           | 9    | (75)    |
| bDMARD treatment 3rd line, n (%)               | 28              | 2    | (7.1)  | 12           | 1    | (8.35)  |
| Adalimumab, n (%)                              | 28              | 8    | (28.6) | 12           | 5    | (41.7)  |
| Infliximab, n (%)                              | 28              | 8    | (28.6) | 12           | 3    | (25)    |
| Certolizumab, n (%)                            | 28              | 5    | (17.9) | 12           | 2    | (16.7)  |
| Etanercept, n (%)                              | 28              | 5    | (17.9) | 12           | 2    | (16.7)  |
| Golimumab, n (%)                               | 28              | 2    | (7.14) | 12           | 0    | (0)     |

Supplementary Table 1. Patient Characteristics stratified by methotrexate therapy.

\*  $\chi^2$  test, p=0.03\*\*  $\chi^2$  test, p=0.04

*Abbreviations:* Av.Obs.: Available Observations; bDMARD: biologic disease-modifying anti-rheumatic drugs; CDAI: Clinical Disease Activity Index; DAPSA: Disease Activity in Psoriatic Arthritis; LDA: Low Disease Activity; PASI: Psoriasis Area Severity Index; MMAS-4: Morisky Medication Adherence Score on 4 Items; PsAID12: Psoriatic Arthritis Impact of Disease.

| Patient Characteristics                        | No-Glucocorticoid |      |        | Glucocorticoids |      |         |
|------------------------------------------------|-------------------|------|--------|-----------------|------|---------|
|                                                | Av.Obs.           |      |        | Av.Obs          |      |         |
| Age, mean (SD)                                 | 29                | 52.6 | (10.3) | 11              | 53.6 | (11.3)  |
| Female, n (%)                                  | 29                | 15   | (51.7) | 11              | 3    | (27.3)  |
| Disease duration, years, mean (SD)             | 29                | 9.5  | (6.7)  | 11              | 15   | (13)    |
| Axial, n (%)                                   | 29                | 3    | (10.3) | 11              | 3    | (27.3)  |
| Psoriasis, n (%)                               | 29                | 23   | (79.3) | 11              | 10   | (90.9)  |
| Polyarticular, n (%)                           | 29                | 12   | (41.4) | 11              | 6    | (54.6)  |
| PsAID12 at vaccination, mean (SD)              | 29                | 2    | (2.1)  | 11              | 4.13 | (2.4)   |
| MMAS-4 at vaccination, median (min-max)        | 29                | 0    | (0-1)  | 11              | 0    | (0-1)   |
| DAPSA at vaccination, mean (SD)                | 29                | 10   | (7.9)  | 11              | 14.8 | (6.7)   |
| PASI at vaccination, mean (SD)                 | 29                | 0.6  | (1.1)  | 11              | 0.3  | (0.5)   |
| CDAI at vaccination, mean (SD)                 | 29                | 6.6  | (5.7)  | 11              | 8.4  | (3.7)   |
| CDAI Remission/LDA at vaccination, n (%)       | 29                | 21   | (72.4) | 11              | 6    | (54.6)  |
| CDAI post-vaccination, mean (SD)               | 29                | 6.6  | (5.8)  | 11              | 8.2  | (3.3)   |
| CDAI Remission/LDA post-vaccination, n (%)     | 29                | 20   | (74.1) | 11              | 7    | (63.6)  |
| Glucocorticoid dose, mean (SD)                 | 29                | 0    | (0)    | 11              | 4.66 | (1.97)  |
| Sulfasalazine, n (%)                           | 29                | 5    | (17.2) | 11              | 3    | (18.2)  |
| Methotrexate, n (%)                            | 29                | 6    | (20.7) | 11              | 6    | (54.6)* |
| Last methotrexate dose, days, median (min-max) | 29                | 3    | (2-5)  | 11              | 3.5  | (1-6)   |
| bDMARD treatment 1st line, n (%)               | 29                | 5    | (17.2) | 11              | 2    | (18.2)  |
| bDMARD treatment 2nd line, n (%)               | 29                | 19   | (65.6) | 11              | 10   | (90.9)  |
| bDMARD treatment 3rd line, n (%)               | 29                | 2    | (6.9)  | 11              | 1    | (9.1)   |
| Adalimumab, n (%)                              | 29                | 9    | (31)   | 11              | 4    | (36.4)  |
| Infliximab, n (%)                              | 29                | 6    | (20.7) | 11              | 1    | (9.1)   |
| Certolizumab, n (%)                            | 29                | 5    | (17.2) | 11              | 2    | (18.2)  |
| Etanercept, n (%)                              | 29                | 2    | (6.9)  | 11              | 0    | (0)     |
| Golimumab, n (%)                               | 29                | 7    | (24.1) | 11              | 4    | (36.4)  |

Supplementary Table 2. Patient Characteristics stratified by glucocorticoid therapy.

\*  $\chi^2$  test, p=0.93

*Abbreviations:* Av.Obs.: Available Observations; bDMARD: biologic disease-modifying anti-rheumatic drugs; CDAI: Clinical Disease Activity Index; DAPSA: Disease Activity in Psoriatic Arthritis; LDA: Low Disease Activity; PASI: Psoriasis Area Severity Index; MMAS-4: Morisky Medication Adherence Score on 4 Items; PsAID12: Psoriatic Arthritis Impact of Disease.

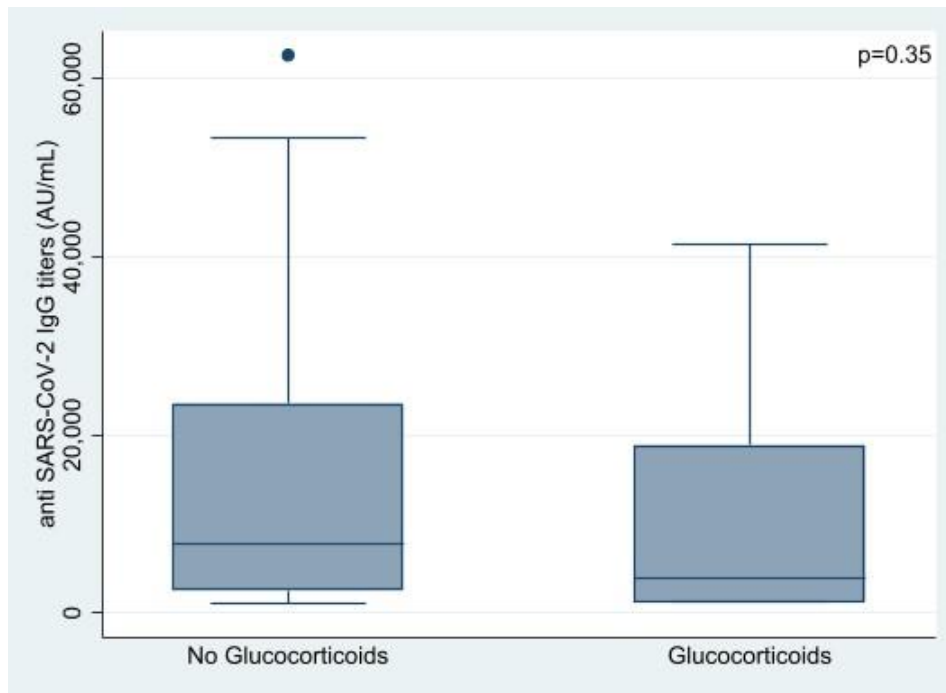

Supplementary Figure 1. anti-SARS-CoV-2 IgG titers of patients with Psoriatic Arthritis stratified by glucocorticoid therapy.

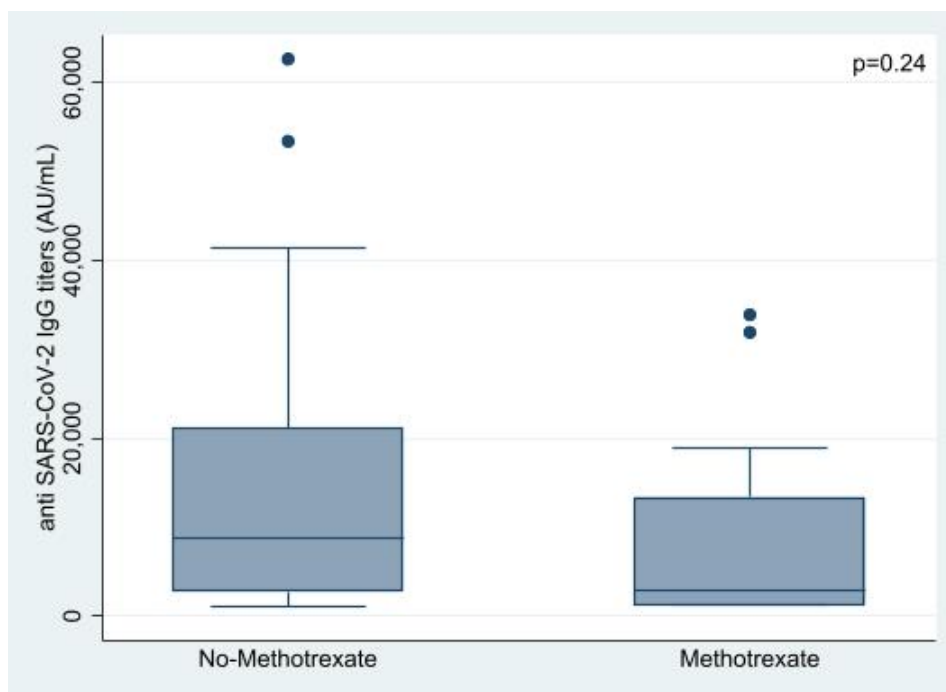

Supplementary Figure 2. anti-SARS-CoV-2 IgG titers of patients with Psoriatic Arthritis stratified by methotrexate therapy.
